# Supplementary material for: Differences in Treatment Response in Bronchial Epithelial Cells from Idiopathic Pulmonary Fibrosis (IPF) Patients: A First Step towards Personalized Medicine?
Source: MDPI journal article supplement (doi:10.3390/antiox12020443), 2023-02-10
Supplement: s1 [file s1]

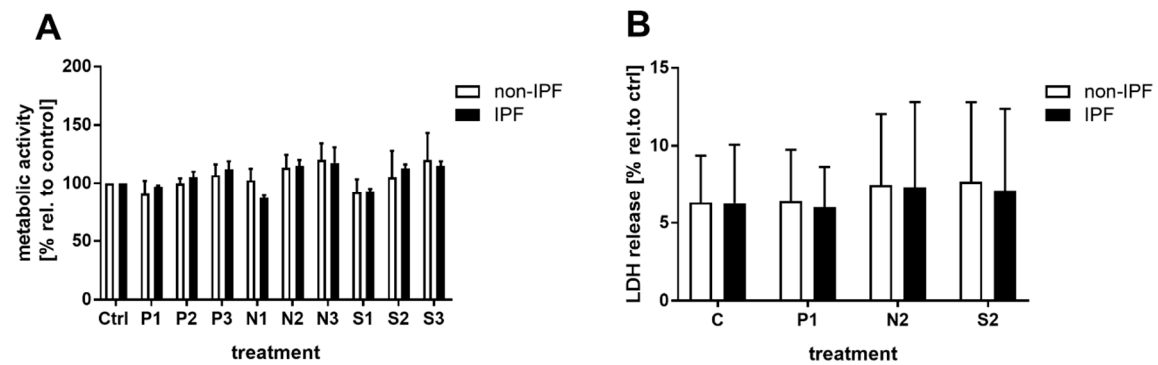

**Figure S1.** Pirfenidone, nintedanib and saracatinib do not influence cell viability. **(A)** MTT assay and **(B)** LDH assay after treatment with different doses of pirfenidone (P1: 1 mM, P2: 500  $\mu$ M, P3: 100  $\mu$ M), nintedanib (N1:1  $\mu$ M, N2: 0.1  $\mu$ M, N3: 0.01  $\mu$ M) and saracatinib (S1: 10  $\mu$ M, S2: 1  $\mu$ M, S3: 0.1  $\mu$ M) for 24 hrs in IPF patients (n = 4) and controls (n = 3). Data are presented as mean  $\pm$  SD.

**Table S1.** Gene expression of NOX4, NRF2, HO-1,  $\gamma$ GCS, SOD1, SOD2, CAT, GLRX, TRX1 and TRX2 for individual IPF patients without and with treatment with pirfenidone (1mM), nintedanib (0.1  $\mu$ M) and saracatinib (1  $\mu$ M) for 24 hrs. Fold increase was expressed compared to untreated non-IPF controls.

|                  | NOX4 | NRF2 | HO-1 | $\gamma$ GCS | SOD1 | SOD2 | CAT  | GLRX | TRX1 | TRX2 |
|------------------|------|------|------|--------------|------|------|------|------|------|------|
| <b>Patient 1</b> | 8,59 | 0,43 | 0,95 | 0,24         | 0,44 | 3,11 | 0,36 | 1,04 | 0,29 | 0,37 |
| <b>P</b>         | 6,77 | 0,64 | 2,25 | 0,32         | 0,49 | 3,06 | 0,53 | 1,31 | 0,41 | 0,49 |
| <b>N</b>         | 3,93 | 0,39 | 1,09 | 0,19         | 0,33 | 2,69 | 0,26 | 0,78 | 0,21 | 0,31 |
| <b>S</b>         | 4,16 | 0,60 | 2,00 | 0,42         | 0,59 | 4,20 | 0,50 | 1,39 | 0,38 | 0,62 |
| <b>Patient 2</b> | 2,24 | 0,93 | 2,22 | 2,07         | 1,07 | 1,18 | 1,21 | 1,18 | 0,94 | 1,05 |
| <b>P</b>         | 1,91 | 0,81 | 1,89 | 0,87         | 0,61 | 0,81 | 0,61 | 1,38 | 0,75 | 0,62 |
| <b>N</b>         | 0,89 | 0,75 | 1,26 | 0,74         | 0,60 | 1,20 | 0,64 | 1,32 | 0,42 | 0,57 |
| <b>S</b>         | 0,58 | 0,83 | 0,27 | 0,76         | 0,79 | 1,25 | 0,79 | 1,26 | 0,68 | 0,69 |
| <b>Patient 3</b> | 3,74 | 0,79 | 1,24 | 0,86         | 0,77 | 1,34 | 0,61 | 1,51 | 0,75 | 0,77 |
| <b>P</b>         | 0,38 | 1,28 | 5,68 | 1,66         | 1,04 | 0,86 | 0,84 | 1,46 | 1,09 | 0,96 |
| <b>N</b>         | 0,34 | 0,82 | 2,53 | 1,36         | 1,18 | 0,80 | 1,04 | 1,33 | 0,62 | 0,68 |
| <b>S</b>         | 1,71 | 0,88 | 1,30 | 1,00         | 0,86 | 0,76 | 0,46 | 1,10 | 0,54 | 0,59 |
| <b>Patient 4</b> | 1,37 | 0,38 | 3,54 | 1,22         | 0,33 | 1,18 | 0,18 | 4,86 | 0,77 | 4,59 |
| <b>P</b>         | 0,59 | 0,36 | 3,08 | 0,83         | 0,29 | 1,35 | 0,21 | 3,76 | 0,74 | 2,64 |
| <b>N</b>         | 0,47 | 0,41 | 0,62 | 0,77         | 0,28 | 1,83 | 0,23 | 2,71 | 0,57 | 3,55 |
| <b>S</b>         | 0,62 | 0,50 | 1,41 | 0,58         | 0,36 | 1,17 | 0,19 | 4,54 | 0,83 | 2,28 |
